# Supplementary material
Source: PubMed Central journal article supplement (PMC3025640)
Supplement: supp_kwq322_Web_Material.pdf [file supp_kwq322_Web_Material.pdf]

## Screening Questions for Cellular Telephone Study

1. Hello, I'm \_\_\_\_\_ calling for Fred Hutchinson Cancer Research Center. I'm not asking for a donation or selling anything. We are conducting a study related to cell phone use and will pay \$20 to eligible people who complete a short interview. This is not a study of cell phones and cancer. I know I'm calling you on your cell phone, but I just have a few brief questions to find out if you are eligible. Are you driving a car now?

**IF YES,**  
Go to Exit 1  
**IF NO,**  
continue to #2

**Exit 1:** When is a better time to call you back?

2. Are you in a safe place to talk?

**IF NO,** Go to Exit 1  
**IF YES,** continue to #3

3. Have I reached xxx-xxx-xxxx?

**IF MISDIALED,**  
Go to Exit 2  
**IF CORRECT #,**  
continue to #4

**Exit 2:** I'm sorry. I seem to have dialed the wrong number.

4. Do you have a regular (landline) telephone in your residence in addition to your cell phone?

**IF NO,**  
continue to #5  
**IF YES,**  
Go to 4a.

- 4a. Do you receive most of your calls on your cellular telephone or your landline telephone?

\_\_\_\_\_ Cell (Go to 4b)

\_\_\_\_\_ Landline (Go to Exit 3)

**Exit 3:** We are only interviewing people who mostly use cellular telephones at this time. Thank you very much for your time.

- 4b. Do you or anyone in your household ever answer your landline telephone?

\_\_\_\_\_ YES (Go to Exit 4)

\_\_\_\_\_ NO (Go to 5)

**Exit 4:** We are only interviewing people who do not have or use landline telephones at this time. Thank you very much for your time.

5. Are you between the ages of 20 and 44 years?

**IF NO,**  
Go to Exit 5  
**IF YES,**  
Continue to #6

**Exit 5:** We are only interviewing people between the ages of 20 and 44 at this time. Thank you very much for your time.

## Screening Questions for Cellular Telephone Study

6. Is this number a business or personal number

**IF PERSONAL,**

continue to #7

**IF BUSINESS,**

Go to 6a.

6a. If business, is it also used for personal calls?

**IF YES,**

Go to #7

**IF NO,**

Go to exit 6

**Exit 6:** We are only interviewing people with personal cellular telephones at this time. Thank you very much for your time.

7. Do you live in King, Pierce or Snohomish County?

**IF NO,**

Go to Exit 7

**IF YES,**

**Exit 7:** We are only interviewing people in King, Pierce and Snohomish counties at this time. Thank you very much for your time.

*Continue to #8.8.* We will send you \$20 as a thank you and to compensate you for any cellular charges if you are willing to do a 10-15 minute interview. May I tell you more about the interview?

**IF NO,**

Go to 8a.

**IF YES,**

Continue to #9.

8a. Would you be willing to answer these questions later on your cell phone or the internet?

**IF No,**

Go to Exit 8

**Exit 8:** Thank you very much for your time.

**IF YES,** and will answer over cell phone:

What is a good time to call you back? \_\_\_\_\_ AM PM

**IF YES** and internet: The website address is [www.cellphonestudy.org](http://www.cellphonestudy.org). Would you like me to text-message or e-mail this website address to you?

\_\_\_\_\_ Text Message: Thank you for your time, a text message will be sent to you soon.  
Good Bye.

\_\_\_\_\_ E-mail:

What is your e-mail address? \_\_\_\_\_  
Thank you for your time. Good Bye.

9. The study requires me to ask if you are male or female.

Male (go to interview for men)

Female (go to interview for women)

Date / Time

Study ID: \_\_\_\_\_

## **CELLULAR TELEPHONE INTERVIEW - MEN**

Thank you for agreeing to answer some additional questions over your cellular phone. We will send you a check for \$20.00 as a thank you and to cover any cost to you for the cellular minutes. The questions will take about 15 minutes and include questions about your general health, smoking, alcohol use, exercise, reproductive history, physical characteristics and cell phone use. Some of the questions might be sensitive or seem personal. Your participation in this study is completely voluntary and you may refuse to answer any questions or stop the interview at any time. Your answers will be kept confidential as provided by law. I'm required to read a formal explanation of this study. This study is being done by the Fred Hutchinson Cancer Research Center and is funded by the National Institutes of Health. The leader of this study is Dr. Lynda Voigt. The purpose of this study is to learn more about the differences between men who primarily use cell phones and men who use landline home phones. We currently use home phones to invite men who do not have cancer to participate in our studies. We hope to better understand any differences between those men and men like you who have not had an opportunity to participate because they only use cellular telephones. In order to do this, we need to ask some of the same questions in this interview that we ask in our current cancer studies.

A supervisor may monitor or record this interview.

The information you provide will be kept confidential. You will not be personally identified in research reports. Your information will be grouped with that of other people in the study. Only the investigators and the study staff directly involved with the project will have access to research information that can identify you. This information will be destroyed when the study is completed. As part of their responsibility to protect the rights of study participants, the staff of the Fred Hutchinson Cancer Research Center Institutional Review Office and the Office of Human Research Protection may have access to your research information. If you have questions about the study, you can contact Dr. Voigt, the principal study investigator. Karen Hansen, Director of the Fred Hutchinson Institutional Review Office, can answer any questions about your rights as a research participant. These names and telephone numbers and the information I have just given you are at our website, [cellphonestudy.org](http://cellphonestudy.org). If you prefer, I can give you these telephone numbers now.

Do you have any questions about this study? (Answer questions or refer them to the one of the study investigators)

Date / Time  
Study ID: \_\_\_\_\_

If no questions: Do you agree to participate in this study?

YES..... 1  
NO ..... 2

IF NO: Would you be willing to participate at another time or do the interview at a website?

YES, at another time..... 3  
Please tell me a good day and time to call you back  
DAY \_\_\_\_\_ TIME \_\_ \_\_: \_\_ \_\_ AM/PM Yes,  
at a website.....4

Give the website address: **cellphonestudy.org**  
Would you like me to text message or e-mail the web address to you?

If e-mail, what is your e-mail address?

IF NO: Thank you for your time.

1. Would you prefer to be called at a time when you have free cell phone minutes?

YES..... 1  
NO ..... 2

IF YES: Please tell me a good day and time to call you back

DAY \_\_\_\_\_ TIME \_\_ \_\_: \_\_ \_\_ AM/PM

Are you still in a place where you can safely and privately talk on the phone? If no, please tell me a good day and time to call you back :

DAY \_\_\_\_\_ TIME \_\_ \_\_: \_\_ \_\_ AM/PM

2. How old are you? (IF RELUCTANT TO ANSWER, ASK THE FOLLOWING AGE GROUPS):

\_\_ \_\_ (AGE) Or: 20-24 25-29 30-34 35-39 40-44

3. How many other adults between the ages of 20-44 years use this cell phone?

\_\_ \_\_ \_\_

4. How many other men between the ages of 20-44 live in your household? \_\_ \_\_ \_\_

IF ONE OR MORE, ASK: How many have their own cell phones? \_\_ \_\_ \_\_

Date / Time  
Study ID: \_\_\_\_\_

Now I am going to ask you some questions about your health history.

**5. Have you ever smoked a total of 100 cigarettes or more in your lifetime?**

YES ..... 1  
NO ..... 2  
REFUSED ..... 7  
DON'T KNOW ..... 9

4a. Do you still smoke?

YES ..... 1  
NO ..... 2  
REFUSED ..... 7  
DON'T KNOW ..... 9

**6. On average, do you drink more than 14 alcoholic drinks per week?**

YES ..... 1  
NO ..... 2  
REFUSED ..... 7  
DON'T KNOW ..... 9

**7. When you were in grades 7 through 12, how many hours per week did you usually spend performing vigorous exercise? Vigorous exercise includes running, racket sports, swimming, aerobics and other activities that increase your heart rate, make you sweat and breathe hard.**

Hours per week: \_\_\_\_\_

**8. How many hours per week or month did you usually take part in vigorous exercise or sports activities in the last two years?**

Hours \_\_\_\_\_ per week month

**9 . What is your height? \_\_\_ / \_\_\_ \_\_\_ (FT/INCHES)**

**10. What is your approximate current weight? \_\_\_ \_\_\_ \_\_\_ POUNDS**

The following questions were asked of men who are participating in one of our current cancer studies because we are investigating whether or not these factors are related to some types of cancer. We will compare their answers with those of men like you who primarily use cell phones to see if there are any important differences.

Date / Time

Study ID: \_\_\_\_\_

11. Have you ever fathered a live-born child?

YES ..... 1  
NO ..... 2  
REFUSED ..... 7  
DON'T KNOW ..... 9

12. Have you or your partner ever have tests done for infertility or because your partner was having a problem becoming pregnant?

YES ..... 1  
NO ..... 2  
REFUSED ..... 7  
DON'T KNOW ..... 9

13. Do you consider yourself to be of Hispanic or Latino origin?

YES..... 1  
NO ..... 2  
DON'T KNOW ..... 7

14. How would you describe your race? (CHECK ALL THAT APPLY)

White ..... 1  
Black or African American ..... 2  
American Indian/Eskimo ..... 3  
Asian..... 4  
Other (specify)\_\_\_\_\_ 5  
Don't know ..... 9

15. Do you have a college degree?

YES ..... 1  
NO ..... 2  
DON'T KNOW ..... 3  
  
REFUSED.....9

16. What is your current marital status? (*read choices*)

Married ..... 1  
Single ..... 2  
Living with partner.....3  
Refused.....9

17. Which of the following categories best describe your total household income: (*read choices*)

< 25,000 a year?.....1  
25,000 – 50,000 a year?.....2

Date / Time

Study ID: \_\_\_\_\_

- 50,000 – 75,000 a year?.....3
- > 75,000 each year?.....4
- Unsure/refused.....7

Last, I have a few questions about your cell phone use.

**18.** How often is your cell phone on? (*read choices*)

- More than 12 hours a day? .....1
- 10-12 hours a day .....2
- 7-10 hours a day .....3
- <7 hours a day .....4
- Refused.....9

**19.** Do you generally prefer to be called when you have free minutes?

- YES.....1
- NO .....2
- DOESN'T MATTER .....3
- REFUSED.....9

**20.** How many anytime minutes are included in your cell phone plan? (*read choices*)

- None .....1
- <100.....2
- 100-299 .....3
- 300-500 .....4
- > 500.....5
- Refused.....9

**21.** Do you have unlimited weekend and night minutes?

- YES.....1
- NO .....2
- DON'T KNOW .....7
- REFUSED.....9

**22.** Are there other cell phones that you use regularly, or is it just this one?

- YES, I also use other cell phones regularly.....1
- If yes, how many other cell phones do you use? \_\_\_\_\_
- NO.....2
- REFUSED.....9

Date / Time

Study ID: \_\_\_\_\_

**23.** How do you feel about being called on your cell phone for a research study? (*read choices*)

- Don't mind..... 1
- Neither like or dislike..... 2
- Don't like it, but willing..... 3
- Don't like it and would be unwilling in the future ..... 4
- Intensely dislike it..... 5
- Other \_\_\_\_\_ 6

**24.** If you were to get calls about a research study on your cell phone, on what days and times would you prefer to be called? (*read choices*)

Weekday:

- Morning (8 AM - Noon) ..... 1
- Afternoon (Noon - 5:00 PM)..... 2
- Evening (5:00 - 9:00 PM) ..... 3
- Late evening (9:00 - 10:00 PM) ..... 4

Weekend:

- Morning (8 AM - Noon) ..... 5
- Afternoon (Noon - 5:00 PM)..... 6
- Evening (5:00 - 9:00 PM) ..... 7
- Late evening (9:00 - 10:00 PM) ..... 8

Refused.....9

**25.** We are not looking for people to do longer interviews at this time, but would like to know if, in general, people contacted on their cell phone might participate in our studies in the future. If you were called on your cell phone and asked to participate in a study that would help us learn more about cancer, how willing would you be to participate in a study that involved a 90 minute in-person interview either in your home or wherever you felt comfortable? (*read choices*)

- Very willing.....1
- Somewhat willing .....2
- Somewhat unwilling.....3
- Very unwilling.....4
- Don't know.....7
- Refused.....9

**Closing statement:**

This completes our telephone interview. This is the first time we have conducted interviews over cellular telephones. Do you have any suggestions/comments about this experience or how we could improve the interview?

Thank you for your time! Where should we send the \$20 check?



Date / Time

Study ID: \_\_\_\_\_

(Name and address data will be stored in a separate and secure SQL file – it will not be kept with the interview data).

Where should we send the \$20 check?

Name \_\_\_\_\_

Address \_\_\_\_\_

City \_\_\_\_\_

Time interview completed: (automatic computer stamp)

For the interviewer to complete:

Respondent's cooperation was:

EXCELLENT ..... 1  
GOOD..... 2  
FAIR..... 3  
POOR ..... 4

I think that the reliability of the respondent's information was:

EXCELLENT ..... 1  
GOOD..... 2  
FAIR..... 3  
POOR ..... 4

The subject's ability to communicate verbally in English was:

EXCELLENT ..... 1  
GOOD..... 2  
FAIR..... 3  
POOR ..... 4

The overall quality of this interview is:

EXCELLENT ..... 1  
GOOD..... 2  
FAIR..... 3  
POOR ..... 4

Was there an unusual situation or information?

YES ..... 1 (COMMENTS)  
NO ..... 2 (END)

**COMMENTS:**

Date / Time

Study ID: \_\_\_\_\_

---

REFUSAL WAS: MILD ①

FIRM ②

HOSTILE ③ (CIRCLE ONE)

Date / Time  
Study ID: \_\_\_\_\_

# Cellular Telephone Interview - Women

Thank you for agreeing to answer some additional questions over your cell phone. We will send you a check for \$20.00 as a thank you and to reimburse you for any cellular charges. The questions will take about 10-15 minutes and include questions about your general health, family history of breast cancer, use of birth control, reproductive history, height and weight. Some of the questions might be sensitive or seem personal. Your participation in this study is completely voluntary and you may refuse to answer any questions or stop the interview at any time. I'm required to read a formal explanation of this study. This study is being done by the Fred Hutchinson Cancer Research Center and is funded by the National Institutes of Health. The purpose of this study is to learn more about the differences between women who primarily use cell phones and women who use landline home phones. We currently use home phones to invite women who do not have cancer to participate in our studies. We hope to better understand any differences between those women and women like you who have not had an opportunity to participate because they only use cellular telephones. In order to do this, we need to ask some of the same questions in this interview that we ask in our current cancer studies.

A supervisor may monitor or record the interview.

The information you provide will be kept confidential. You will not be personally identified in research reports. Your information will be grouped with that of other people in the study. Only the investigators and the study staff directly involved with the project will have access to research information that can identify you. This information will be destroyed when the study is completed. As part of their responsibility to protect the rights of study participants, the staff of the Fred Hutchinson Cancer Research Center Institutional Review Office and the Office of Human Research Protection may have access to your research information. If you have questions about the study, you can contact Dr. Lynda Voigt, the principal study investigator. Karen Hansen, Director of the Fred Hutchinson Institutional Review Office, can answer any questions about your rights as a research participant. These names and telephone numbers and the information I have just given you are at our website, [cellphonestudy.org](http://cellphonestudy.org). If you prefer, I can give you these telephone numbers now.

Do you have any questions about this study? (Answer questions or refer them to the one of the study investigators)

If no questions: Do you agree to participate in this study?

YES.....1  
NO.....2

Date / Time

Study ID: \_\_\_\_\_

IF NO: Would you be willing to participate at another time or do the interview at a website?

YES, at another time .....3

Please tell me a good day and time to call you back

DAY \_\_\_\_\_ TIME \_\_ \_\_: \_\_ \_\_ AM/PM

Yes, at a website.....4

Give the website address: **cellphonestudy.org**

Would you like me to text message or e-mail the web

address to you?

If e-mail, what is your e-mail address?

IF NO: Thank you for your time.

1. Would you prefer to be called at a time when you have free cell phone minutes?

YES .....1

NO.....2

IF YES: Please tell me a good day and time to call you back

DAY \_\_\_\_\_ TIME \_\_ \_\_: \_\_ \_\_ AM/PM

Are you still in a place where you can safely and privately talk on the phone? If no, please tell me a good day and time to call you back :

DAY \_\_\_\_\_ TIME \_\_ \_\_: \_\_ \_\_ AM/PM

2. How old are you? (IF RELUCTANT TO ANSWER, ASK THE FOLLOWING AGE GROUPS):

\_\_ \_\_ (AGE) Or: 20-24 25-29 30-34 35-39 40-44

3. How many other adults between the ages of 20-44 years use this cell phone?

\_\_ \_\_ \_\_

4. How many other women between the ages of 20-44 live in your household? \_\_ \_\_ \_\_

IF ONE OR MORE, ASK: How many have their own cell phones? \_\_ \_\_ \_\_

Now I am going to ask you some questions about your health history.

5. Have you ever had a mammogram? (A mammogram is an x-ray taken only of the breasts by a machine that presses the breast against a plate.)

YES .....1

NO.....2

DON'T KNOW .....7

REFUSED.....9

6. Have you ever smoked a total of 100 cigarettes or more in your lifetime?

- YES.....1
- NO .....2
- REFUSED.....7
- DON'T KNOW.....9

6a. Do you still smoke?

- YES.....1
- NO .....2
- REFUSED.....7
- DON'T KNOW.....9

7. What is your approximate weight? \_\_\_ \_\_\_ POUNDS

8. What is the tallest you have ever been without shoes? \_\_\_ / \_\_\_ (FT/INCHES)

The following questions were asked of women who are participating in one of our current cancer studies because we are investigating whether or not these factors are related to some types of cancer. We will compare their answers with those of women like you who primarily use cell phones to see if there are any important differences.

9. Have you ever diagnosed with breast cancer?

- YES .....1
- IF YES, ASK: How old were you when you were diagnosed?  
\_\_\_ (AGE)
- NO.....2
- REFUSED.....9

10. This question is about your immediate female blood relatives including only your mother, full or half sisters, grandmothers and aunts. Have any of these female blood relatives ever have **breast cancer**?

- YES .....1
- NO.....2(GO TO QUESTION 10a)
- DON'T KNOW .....7 (GO TO QUESTION 11)
- REFUSED.....9 (GO TO QUESTION 11)

10a. **IF YES to 10**, Which of your **female** relatives had **breast cancer**? (*read choices; CIRCLE ALL THAT APPLY*)

- MOTHER .....1
- GRANDMOTHER(S) .....2
- AUNT(S) .....3
- FULL SISTER(S) .....4
- HALF SISTER(S).....5

11. Have you ever had one or both of your ovaries removed?

- ONE .....1
- BOTH .....2
- NONE.....3
- DON'T KNOW .....7
- REFUSED.....9

12. Have you ever had a live or still birth?

- YES .....1
- NO ..... 2 (GO TO QUESTION 9)
- DON'T KNOW ..... 7 (GO TO QUESTION 9)
- REFUSED.....9 (GO TO QUESTION 9)

12a. How old were you when you FIRST gave birth?

\_\_ \_\_ (AGE)

(If reluctant to answer, ask:

- <20 years of age.....1
- 20 years of age or older.....2

13. Have you ever use any **birth control** methods, such as any type of **birth control pill, shot, patch, IUD**, or any other type of birth control method?

- YES .....1 (GOTO QUESTION 13a)
- NO..... 2 (GO TO QUESTION 14)
- DON'T KNOW ..... 7 (GO TO QUESTION 14)
- REFUSED.....9 (GO TO QUESTION 14)

13a. Did you ever use birth control pills?

- YES .....1
- NO .....2
- DON'T KNOW.....7
- REFUSED.....9

13b. Did you ever use birth control shots?

- YES .....1
- NO .....2
- DON'T KNOW.....7
- REFUSED.....9

14. Do you consider yourself to be of Hispanic or Latina origin?

- YES .....1
- NO .....2
- DON'T KNOW .....3
- REFUSED.....9

15. How would you describe your race? (CHECK ALL THAT APPLY)

- WHITE.....1
- BLACK OR AFRICAN AMERICAN.....2
- AMERICAN INDIAN .....3
- ASIAN .....4
- OTHER (specify)\_\_\_\_\_5
- DON'T KNOW .....7
- REFUSED.....9

16. Do you have a college degree?

- YES .....1
- NO .....2
- DON'T KNOW .....7
- REFUSED.....9

17. What is your current marital status? (*read choices*)

- Married.....1
- Single .....2
- Living with partner.....3
- Refused.....9

18. Which of the following categories best describe your total household income? (*read choices*)

- < 25,000 a year?.....1
- 25,000 – 50,000 a year?.....2
- 50,000 – 75,000 a year?.....3
- > 75,000 each year?.....4
- Unsure/refused.....9

**Last, I have a few questions about your cell phone use.**

**19.** How often is your cell phone on? (*read choices*)

- More than 12 hours a day .....1
- 10-12 hours a day .....2
- 7-10 hours a day .....3
- <7 hours a day .....4
- Refused.....9

**20.** Do you generally prefer to be called when you have free minutes?

- YES .....1
- NO .....2
- DOESN'T MATTER.....3
- REFUSED.....9

**21.** How many anytime minutes are included in your cell phone plan? (*read choices*)

- NONE .....1
- <100 .....2
- 100-299 .....3
- 300-500 .....4
- > 500 .....5
- Refused.....9

**22.** Do you have unlimited weekend and night minutes?

- YES .....1
- NO .....2
- DON'T KNOW .....7
- REFUSED.....9

**23.** Do you share this cell phone with other adults who were between 20 and 44 years of age?

- YES .....1
- NO .....2
- DON'T KNOW .....7
- REFUSED.....9

If yes, how many other adults between 20 and 44 years of age use this cell phone at least one-third of the time?

Number\_\_\_\_\_

**24.** Are there other cell phones that you use regularly, or is it just this one?

- YES, I also use other cell phones regularly .....1
- If yes, how many other cell phones do you use? \_\_\_\_\_
- NO .....2
- REFUSED.....9



25. How do you feel about being called on your cell phone for a research study? (*read choices*)

- Don't mind .....1
  - Neither like nor dislike .....2
  - Don't like it, but willing .....3
  - Don't like it and would be unwilling in the future .....4
  - Intensely dislike it .....5
  - Other .....6
- Specify \_\_\_\_\_

26. If you were to get calls about a research study on your cell phone, on what days and times would you prefer to be called? (*read choices*)

Weekday:

- Morning (8 AM - Noon).....1
- Afternoon (Noon - 5:00 PM) .....2
- Evening (5:00 - 9:00 PM) .....3
- Late evening (9:00 - 10:00 PM).....4

Weekend:

- Morning (8 AM - Noon).....5
- Afternoon (Noon - 5:00 PM) .....6
- Evening (5:00 - 9:00 PM) .....7
- Late evening (9:00 - 10:00 PM).....8
- Refused.....9

27. Although we are not looking for people to do longer interviews at this time,, but would like to know if, in general, people contacted on their cell phone might participate in our studies in the future. If you were called on your cell phone and asked to participate in a study that would help us learn more about cancer, how willing would you be to do a 90 minute in-person interview either in your home or wherever you felt comfortable for a study to help us learn more about cancer? (*read choices*)

- VERY WILLING .....1
- SOMEWHAT WILLING .....2
- SOMEWHAT UNWILLING .....3
- VERY UNWILLING.....4
- DON'T KNOW .....7

**Closing statement:**

This completes our telephone interview. This is the first time we have conducted interviews over cellular telephones. Do you have any suggestions/comments about this experience or how we could improve the interview?

Thank you for your time! Where should we send the \$20 check?

(Name and address data will be sent to a separate and secure SQL file – it will not be kept with the interview data).

Date / Time

Study ID: \_\_\_\_\_

Where should we send the \$20 check?

Name \_\_\_\_\_

Address \_\_\_\_\_

City \_\_\_\_\_

Time interview completed: (automatic computer stamp)

For the interviewer to complete:

Respondent's cooperation was:

EXCELLENT ..... 1

GOOD ..... 2

FAIR ..... 3

POOR ..... 4

I think that the reliability of the respondent's information was:

EXCELLENT ..... 1

GOOD ..... 2

FAIR ..... 3

POOR ..... 4

The subject's ability to communicate verbally in English was:

EXCELLENT ..... 1

GOOD ..... 2

FAIR ..... 3

POOR ..... 4

The overall quality of this interview is:

EXCELLENT ..... 1

GOOD ..... 2

FAIR ..... 3

POOR ..... 4

**COMMENTS:**

---



---



---



---



---

REFUSAL WAS: MILD ① FIRM ②      HOSTILE ③ (CIRCLE ONE)
